# Supplementary material for: Identification of histone deacetylase genes in Dendrobium officinale and their expression profiles under phytohormone and abiotic stress treatments
Source: PeerJ journal article supplement (doi:10.7717/peerj.10482), 2020-12-15
Supplement: Data_S1.zip [file File 1. Nucleotide and amino acid sequences.xlsx]

## Sheet: Nucleotide sequences
The nucleotide sequences of DoHDAC genes.
Gene	Coding sequence	locus_tag
DoHDA1	ATGGTGGTACAAGTGCAGGAGGAACTTCATCTTGGGAGGAGTGACCAAAGCCATGACATTGTCGGGGGAGAGCGGCACATTGAATCGAAGAGAAACTCGAAGCATCGAGCAAGAGGGAAAGGGGGCAATGAGGAAGAACAAGGGCATGCGCGGACAAGGCTATTGGCAGAGTATTGTAAGAACTTTCAGTTATCTGCTTGGCATCTAATGGTGTCAGCTTCTATAAACAGCCCAAACCCACCAATAGGATTTGCCTTAATCAGGCCACCAGGTCATCATGCAATTCCAAATGGTCCCATGGGTTTCTGTGTATTTGGCAACATAGCTGTTGCTGCTCGCTATGCTCAACATGTGCATGGATTAAGTCGGGTTCTAATTATTGATTTTGATGTTCATCAT…	MA16_Dca024098
DoHDA2	ATGAATTCGTCGCCTGAGGATCGCCGGAGTGCTCGGGTGGGATTAGCTTACGACGAGAGAATGTGTCTGCACGCCACACCCGATGGGGAGAGCCATCCGGAAAACCCCGAGCGGATTAGGGCCATATGGAGGAAGCTGGAGGCGGAAGGCATTCCTGACAGGTGCATATTGCTTAAAATCAAGGAAGCTGAGGATGCAATTATAGCATCTGTGCATACGAGGAATCACATAAAGCTGATAAGAAATATTAGCTCTAAGAAGTTCGATTCTCGACGTCTGATGATTGCTTCGAAGTTGAATTCTATTTATTTTAACGAGGGTTCTTCTAAGGCAGCCTATCTTGCTGCAGGAACCGTTATTGAGGCTACAGAGAATGTTGCGAATGGGAATCTGGATTCT…	MA16_Dca008789
DoHDA3	ATGCCGTCCAAGGACCGAGTAGCGTATTTCTATGACGGGGATGTGGGCAATGTTTATTTTGGACCAAACCATCCAATGAAGCCACATCGTCTCTGTATGACACATCATCTTGTTCTCTCATATGAACTTCACAAGAAGATGGAAATATATAGGCCACACAAGGCATATCCCGTCGAGCTTGCCCAGTTCCATACAGCAGATTATGTGGAGTTCTTGCATCGAATTACACCAGACACACAACATTTGTTTGCAAATGAATTGGCACAATATAATCTTGGCGAGGATTGCCCTGTATTTGAGAACTTGTTTGAGTTCTGTCAAATATATGCTGGTGGCACGATAGATGCTGCACGAAGATTGAACAATCAACTCTGTGACATAGCTATCAATTGGGCTGGT…	MA16_Dca024503
DoHDA4	ATGACTTCACGAAATAAGATGGAAAGCCGAGTGGTCGTTCCTTGCGAGCAAAACTTTGCGGCCTTGGAGGAAGGCAGAAGCTCCTCCGATGGAGCTCCGGGCTCTTCCTTCGTCAGCACTTTCAGTGCTACAGTTTCTGCTTCAAATGCTCATGGAATGGAATTGAGTTTCTCTAATATTCCACCACATGATGCACGTATCCTTTACTCTGTAGCTCCTTCCATGGGCCATAATAAGGAAAATCATCCTGAATCCAATTTAAGGGTTCCTGCAATTGTTAATGCTCTTGAGGCGTTTGAGCTCACATCCAAGTATCGTGGTTTAGAAGTGTTCGAAATGCAAAATTTCCCGCCTGCTTCTGTGGATGATATTGCACGTGTGCATGCAAGGGCCTATGTA…	MA16_Dca024100
DoHDA5	ATGGATCCTTCTTCATCTGCTTTTTCTCGCGAACTATTGCACGTTTTCTGGCACGAGGGCATGCTTAGCCACGACGCCGGCACCGGAATCTTTGACACAGGCCAGGATCCTGGCTTCCTGGAGGTGTTGGAGAAGCATCCAGAGAACGCAGATCGAGTGAAAAACATGGTCTCCATCCTCCGCAAGGGTCCAATCTCTCCATACATCTCCTGGCATTCCGGAAGACCTGCCCAGATTTCCGAGCTCCTCTCCTTCCACACATCCGAATACATAGGTGAACTTATCCAGGCTGATAAGGAAGGTGCTAAAGAACTATGTTCGGGTACTTTTCTAAATCGTGGTTCATGGGGTGCTTGTCTTCTTGCTGCTGGAACCACTTTAGAAGCTATGAAGTATGTG…	MA16_Dca017633
DoHDA6	ATGGGTGCCACCTTGCTTTATGAAAATAAAATTTTGGAGGAAAAAGTTTCAGATGATGTAGCTACAACACGCGGTTCCTTGACTATTAAAGTAGCTGCGATGAGCAATGATGCTGATAATGGTTGCTTGGGTGTTTCCGGTGCTGTACAATTTGAACATAATGGCGAGCAGAGAGGCAATACATTGTGTGATCTCCATCATCAGGAAAATTATGGTGATGATGAGTACGATGAGGAGGATGACAGTGATTGGGAACCTGTTAATCATTTAGTCTTCAAGAAGTGGTTCTGCAGTAACTGTACAATGCCAAATTTTGATGATGTTTATCACTGTGATGTTTGTGGAGAACAAAAGGAGTCTGAGATCTTCAGTCATGAGCTTTTTAAGCACTCTTTCGGT…	MA16_Dca025461
DoHDA7	ATGGACGGCAGCGGGAACTCGCTGGCGTCTGGGCCGGACGCGACGAAGCGCAAGGTATGCTACTTCTATGACTCTGAGGTGGGGAATTACTACTACGGACAAGGTCACCCGATGAAACCGCATCGGATCCGTATGACCCACGCGTTGCTTGCGCACTACGGTCTTTTACAGCACATGCAGGTCTACAAGCCGAATCCAGCTCGGGAACGCGACCTCTGTCGCTTTCACGCCGACGACTATGTTTCCTTCCTCCGGTCCATCACGCCGGAGACGCAGCAGGATCAAATTCGAGCTCTTAAGCGGTTCAATGTTGGCGAGGACTGTCCTGTTTTTGATGGTCTGTACAGCTTCTGTCAGACTTATGCAGGAGGTTCGGTTGGGGGTGCTGTGAAACTCAAC…	MA16_Dca023956
DoHDA8	ATGGGCACTTCGTCATCCCATTCCTCGCCTCCATCTATGGAAGCTGCCGAAGAGCTCCGCAGGAATCGAATCCTATCCAGCAAGCTCTACTTCAATGTGGCTCCATCCAAGGTTGCCGTCATCTATTCTCCTTCGTACGATATAGCGTTTCTTGGAATCGAGAAACTGCACCCTTTTGACTCTTCAAAATGGGGTCGCATCTGCCAGTTCCTGACTAATGAAGGTGTTTTAGATAAGAATAGAATAATAGAACCATTAGAAGCTTCAAAAGATGATTTATTAGTGGTGCATCCAGAATTATACTTGCGTCGTCTCAAAAGCAGTGTGAATGTTTCTATGATTCTAGAGGTCCCTCCTGTTGCAATGCTTCCAAATTGCCTTGTTCAGCAAAAGGTGCTA…	MA16_Dca024452
DoHDA9	ATGCCCGCTTCTCCAACGGCGGTTTCCGCCGATACCTACTCCTCTGGTGGTTCATCGCTGCCGTCGCCATCAGCACCAGACGCTCGGAAGCGGCGGGTTAGCTACTTCTACGAGCCTTCTATAGGCGACTACTACTACGGGCAAGGGCATCCGATGAAGCCCCATCGAATCCGTATGGCTCACAATCTCGTCGTCCACTACCGCCTTCACCATCTCATGGAGGTGTGCCGCCCCTACCCCGCCTCTGCTGCTGATATCCGCCGATTCCATTCTGAGGATTACGTCGACTTCCTTGCCTCCATCACTCCCCAATTCCTTGCCGCCTCAGCCTCCACTTTCGGTTCCAGCGTTGCTGATGATGGCAACAGTGTCCACCCGTTCGAGTCCTCGTCGTCTCGG…	MA16_Dca007093
DoHDA10	ATGACTACCTTGAAAAGCCGAATCGAAGACGCCGATATGGTTGCCAACAATTTCATCGACTGGATCCCTAACTCAGGTCAATGTGCTGTAGCTGATCTACTTGGTGATTGCTGCATCACTTCATATGATTGTTCGGTTATGCTAAAGAGCTTGGTGAAAGTCGCTGATGGAAATATCTTCTTAGCCCTTGAAGGAGGTTACAATTTCAACTCTCTAGTTAATCCAGTTATTGCTTGTGCAAAAACTTTACTTGAAGGGAATCCTGTTGTTGGAAGTTTTTTTAAGGAAAGGCCTTTTGAATCTACTTGGCATGTAATCAACAAGGGAGGAATCAAATCCATCAAAATATATCTCTGGGAAACCTGCACTCATTTGATTAAGTTGGTAGACATTCATCAA…	MA16_Dca005189
DoHDT3	ATGGAGTTCTGGGGTGTTGAAGTTAAACCTGGGCAGACGGTAAAGTGCGAACCTGGAGATGAAGGATACTTGCATCTTTCGCAGGCTTCACTAGGTGAAATCAAGAAGGATAAGGGGACTGGAAATGTTCCAGTTTTTGTTAAATTTAATGATCAAAAGCTAGTTCTTGGGACCCTCTCTACAGAGAATTGTGCCCAGATTCAATATGATATTGTATTTGAGAAGGAATTTGAGTTGTCACACGGTTCAAAGAATACCAGTGTATTTTTTGTTGGTTACAAGAGCATTCATGAGAACTATGCTTCTGAGGATGATTTAGATGGTTCCGATGTTGAGGCTTATCTGAATGATCCGAAAGAGATAGGAGAGGGTTGGCTCAAAAAGAAAAATCTGGTAAAG…	MA16_Dca018807
DoHDT4	ATGACGCAGGCTTCGCTTGGTGTAACTAAGAAGGAAAAAGGGGCTGAAAATGTCCCAATCTTTCTCAAGATTGATGATCAGAAGCTAGTCATTGGAACCCTTTCCATAGATAAATGTGCTCAAATTCACTATGATCTTGTATTTGATAAGGAATTTGAGTTGTCACATGGCTCCAAGAATGCTAGTGTGTTTTTTATCGGTTATAAGAAAGTTATTGTGGGCGATGAATATCCTTTCTATTTCCATTATAGTCTAACATTCTCTTAA	MA16_Dca013049
DoSRT1	ATGTCTTTGGGTTATGCCCAGAAGTTATCTTATAGGGAAGATGTGGGCGTCGTTGGGTTGACTGAGCTTTTCGACCCACCTGCCGTTCTTCAGAGGAAAATTGAAGAGCTGGCCCTGATAATAAAGAAGAGCAAGCATTTGGTGGCATTTACGGGTGCTGGGATATCAACTGCTTGTGGCATACCAGATTTTCGTGGACCAAAGGGTGTATGGACCCTTCAGAGGGAAGGCAAGGGCGTGCCTGAAGCATCTCTACCTTTTCATCGTGCAATGCCAAGCTTGACACATATGGCATTAGTTGAATTGGAAAGAACTGGCATCTTAAAATTTGTCATTAGCCAGAATATTGACAGTCTTCACCTTCGATCTGGAATACCAAGAGAGAAACTTGCAGAGCTA…	MA16_Dca005159
DoSRT2	ATGGTATTGACTGGAGCAGGACTAAGCACTGAATCTGGAATTCCTGATTACAGGAGCCCAAATGGAGCGTATAGCTCTGGTTTTAAACCAATTACTCATCAGGAGTTTGTCCGCTCCAGTCGTGCCCGCAGGAGATATTGGGCTAGGAGTTATGCTGGATGGAGAAGGTTTATTGCTGCACAGCCAAGTCAAGGCCATATTTCACTCGCAACCTTGGAAAAAGCTGGTAGAGTTAATTTCATGATTACCCAAAATGTTGACAGGCTGCATCATCGTGCTGGCAGCGAACCTCTTGAGCTTCATGGTACTGTTTATACTGTAGTGTGTTTAAATTGTGCTATTTCTGTTGACCGAAATTCATTTCAAGATCAAGTAAAGGCCCTCAACCCAAAGTGGGCT…	MA16_Dca004008

## Sheet: Amino acid sequences
The amino acid sequences of DoHDAC proteins.
Protein	Amino acid sequence	Accession numbers
DoHDA1	MVVQVQEELHLGRSDQSHDIVGGERHIESKRNSKHRARGKGGNEEEQGHARTRLLAEYCKNFQLSAWHLMVSASINSPNPPIGFALIRPPGHHAIPNGPMGFCVFGNIAVAARYAQHVHGLSRVLIIDFDVHHGNGTCDAFYDDPNVFFLSTHQVGSYPGTGKIEQVGQGKGEGTTLNLPLPGGSGDYAMRNVFDEVIAPCAQRFKPDIILVSAGYDAHVLDPLAGLQFTAGTYYMLASSIKQLAKELCKGRCVFFLEGGYNLQSLSHSVVDTFRAFLGEPSLAPEFDDPAILYEEPLSKAKQVIQKVKHLHSL	PKU60236.1
DoHDA2	MNSSPEDRRSARVGLAYDERMCLHATPDGESHPENPERIRAIWRKLEAEGIPDRCILLKIKEAEDAIIASVHTRNHIKLIRNISSKKFDSRRLMIASKLNSIYFNEGSSKAAYLAAGTVIEATENVANGNLDSAIAVVRPPGHHAEANEAMGFCLFNNVAIAASYLLNERAELSMRRILIVDWDVHHGNGTQNMFYSDPRVLYFSVHRFDFGSFYPAGSDGSHCMIGEDQGVGYNINVPWEHGQCGDADYLAVWDHILIPVAEAYNPDIILISAGFDAAMGDPLGGCCVTPYGYSVMLKRLMKFADGKIVLALEGGYNLNSLANSVFACAKTLLEGSPIVGNFEGRPFESTWRVINEVRNELKTYWPVFSIDLPEEILIANVERYPIQAGINSSSDSDV…	PKU68308.1
DoHDA3	MPSKDRVAYFYDGDVGNVYFGPNHPMKPHRLCMTHHLVLSYELHKKMEIYRPHKAYPVELAQFHTADYVEFLHRITPDTQHLFANELAQYNLGEDCPVFENLFEFCQIYAGGTIDAARRLNNQLCDIAINWAGGLHHAKKCEASGFCYINDLVLGILELLKYHARVLYIDIDIHHGDGVEEAFYFTDRVMTVSFHKYGDLFFPGTGDVKEIGEREGKYYAINIPLKDGIDDASFTRLFKTIIAKVVETYIPGVIILQCGADSLAGDRLGCFNLSIEGHAECVKFVKKFNLPLLVTGGGGYTKENVARCWTVETSVLLDTELPNEIPENEYINYFAPDYSLKIQSRNMENLNSKSYLRYIYIYITSFALTFYNFLQVPPDFYIPDFDDDELNPDERVSQH…	PKU84582.1
DoHDA4	MTSRNKMESRVVVPCEQNFAALEEGRSSSDGAPGSSFVSTFSATVSASNAHGMELSFSNIPPHDARILYSVAPSMGHNKENHPESNLRVPAIVNALEAFELTSKYRGLEVFEMQNFPPASVDDIARVHARAYVAGLEKVTAAF	PKU60238.1
DoHDA5	MDPSSSAFSRELLHVFWHEGMLSHDAGTGIFDTGQDPGFLEVLEKHPENADRVKNMVSILRKGPISPYISWHSGRPAQISELLSFHTSEYIGELIQADKEGAKELCSGTFLNRGSWGACLLAAGTTLEAMKYVLDGHGKLAYALVRPPGHHAQPSRADGYCFLNNAGIAVQLALDSGCQKVVVIDVDVHYGNGTAEGFYRSNKVLTISLHMNHGSWGPSHPQSGDIDEAGEGDGFGYNLNIPLPNGTGDEGYVYAMNKLVVPAVQEFKPGVVILVVGQDSSAFDPNGRQCLTMAGFRLIGQLSRLLSDQHSNGRLLVVQEGGYHVTYSAYCLHATLEGVLNLPDPLLADPIAYYPEDKGFTVEVVNSIKQHWKDNIPFLKEI	PKU64691.1
DoHDA6	MGATLLYENKILEEKVSDDVATTRGSLTIKVAAMSNDADNGCLGVSGAVQFEHNGEQRGNTLCDLHHQENYGDDEYDEEDDSDWEPVNHLVFKKWFCSNCTMPNFDDVYHCDVCGEQKESEIFSHELFKHSFGDGNWNSINTESLQMFQGTSCKSSTAVGFDERMLLHCEAVMKSHPHPERPDRLKAIAASLAAAGIFPGKCTLIPAREIQLEELQKVHSSDHIEAVQQSSCLLSSYFTPDTYANQHSALAARLAAGLCADLAIFIMSGKTSNGFALVRPPGHHAGIRQAMGFCLHNNAAVAALAAQTAGANKVLIVDWDVHHGNGTQEIFDGNKSVLYVSLHRHENGRFYPGTGAANEVGVMDGKGYSVNIPWSRGGVGDNDYIFAFQHIVLPVASEF…	PKU64419.1
DoHDA7	MDGSGNSLASGPDATKRKVCYFYDSEVGNYYYGQGHPMKPHRIRMTHALLAHYGLLQHMQVYKPNPARERDLCRFHADDYVSFLRSITPETQQDQIRALKRFNVGEDCPVFDGLYSFCQTYAGGSVGGAVKLNHGHDIAVNWAGGLHHAKKCEASGFCYVNDIVLAILELLKKHERVLYVDIDIHHGDGVEEAFYTTDRVMTVSFHKFGDYFPGTGDVRDIGYGKGKYYSLNVPLDDGIDDESYHSLFKPIMGKVMEVFRPGAVVLQCGADSLSGDRLGCFNLSIKGHAECVRYMRSFNVPILLLGGGGYTIRNVARCWCYETGVALGIEVDDKMPVHEYYEYFGPDYTLHVAPSNMENKNSRQMLEDIRSKLLDNLSRLRHAPSVPFQERPPDTEFPE…	PKU63547.1
DoHDA8	MGTSSSHSSPPSMEAAEELRRNRILSSKLYFNVAPSKVAVIYSPSYDIAFLGIEKLHPFDSSKWGRICQFLTNEGVLDKNRIIEPLEASKDDLLVVHPELYLRRLKSSVNVSMILEVPPVAMLPNCLVQQKVLHPFRMQVGGSILAAKLAKERGWAINVGGGFHHCSAQKGGGFCVYADITLCIQYAFVRLNISRVMIIDLDAHQGNGHETDFSDDRRVYIMDMYNSQIYPLDYEARRYIDQKIELKSGTRTKEYLEELERELEGLSADIT	PKU78219.1
DoHDA9	MPASPTAVSADTYSSGGSSLPSPSAPDARKRRVSYFYEPSIGDYYYGQGHPMKPHRIRMAHNLVVHYRLHHLMEVCRPYPASAADIRRFHSEDYVDFLASITPQFLAASASTFGSSVADDGNSVHPFESSSSRQLRRFNVGEDCPVFEGLFEFCQASAGGSIGAAVKLNRGDADIAINWAGGLHHAKKCEASGFCYVNDIVLGILELLKFHKRVLYVDIDVHHGDGVEEAFYTTDRVMTVSFHKFGDFFPGTGHIKDVGFGTGKYYALNVPLNDGIDDESFQGLFRPLISKVMEIYQPDAVVLQCGADSLAGDRLGCFNLSVRGHADCLRFLRSFNVPLMVLGGGGYTMRNVARCWCYETAVAVGVEPDNKLPYSEYYEYFGPDYTLHIEPKNMENKNS…	PKU70342.1
DoHDA10	MTTLKSRIEDADMVANNFIDWIPNSGQCAVADLLGDCCITSYDCSVMLKSLVKVADGNIFLALEGGYNFNSLVNPVIACAKTLLEGNPVVGSFFKERPFESTWHVINKGGIKSIKIYLWETCTHLIKLVDIHQRCKVFDLGGLIVIYTPPR	PKU64266.1
DoHDT3	MEFWGVEVKPGQTVKCEPGDEGYLHLSQASLGEIKKDKGTGNVPVFVKFNDQKLVLGTLSTENCAQIQYDIVFEKEFELSHGSKNTSVFFVGYKSIHENYASEDDLDGSDVEAYLNDPKEIGEGWLKKKNLVKPGKVAAADKDDTVAAKAKTQTGKQDKVEKPKLDDIQNKADDDDEEDKDEDDSNEESDDDDDYNDDEELVKGMIDSDSDDEDKDDSSEDEKANLKVENGKKRSADAALKSPIGKKSKTITPAGNLKIGDTKKGSQTPIPQITKQAGNKAKQQTPKSSGSVMCKTCSKSFNTENALQSHTKAKHSGAK	PKU82649.1
DoHDT4	MTQASLGVTKKEKGAENVPIFLKIDDQKLVIGTLSIDKCAQIHYDLVFDKEFELSHGSKNASVFFIGYKKVIVGDEYPFYFHYSLTFS	PKU81618.1
DoSRT1	MSLGYAQKLSYREDVGVVGLTELFDPPAVLQRKIEELALIIKKSKHLVAFTGAGISTACGIPDFRGPKGVWTLQREGKGVPEASLPFHRAMPSLTHMALVELERTGILKFVISQNIDSLHLRSGIPREKLAELHGNSFSELCPSCGAEYLRDFEVETIGMKLTPRRCSDVKCGARLRDTVLDWGIFAVFPATNSHFTAVCISIWDALPVKEMNPAEQHCKMADVVLCLGTSLQITPACNLPLKSLNGGGKIVIVNLQVSFPERPDMKTAFLAKQPFVLKRETARKRPFTMALKFNFIDGCRCSFTTVFWGVNFQVKLKSFIQDKNEVLKKLRDDADQESQCGQQEIVEKLILPRSESAIHAITTNIMRYNLSETASVEEASSIGDDSKIERFGEGENGD…	PKU64236.1
DoSRT2	MVLTGAGLSTESGIPDYRSPNGAYSSGFKPITHQEFVRSSRARRRYWARSYAGWRRFIAAQPSQGHISLATLEKAGRVNFMITQNVDRLHHRAGSEPLELHGTVYTVVCLNCAISVDRNSFQDQVKALNPKWASAIERLEHGAPGSDKNFGMQQRPDGDIEIDEKFWEQDFIIPDCHQCGGMLKPDVVFFGDNVPKDTADKAMEAAKSSDAFLVLGSSLMTMSAFRLVRAAYEAKADVAIVNIGETRADDFVPLKINARVGEILPRLLQMGCLSIPCIS	PKU81991.1
