# Supplementary material for: Identification of histone deacetylase genes in Dendrobium officinale and their expression profiles under phytohormone and abiotic stress treatments
Source: PeerJ journal article supplement (doi:10.7717/peerj.10482), 2020-12-15
Supplement: Data_S1.zip [file File 2. FKPM values of DoHDAC genes.xlsx]

## Sheet: FPKM
#gene	Wr	Gr	St	Le	Fb
DoHDA1	1.63982	2.94779	1.28766	5.48708	2.81454
DoHDA2	13.7985	17.5011	21.5499	13.9011	20.7257
DoHDA3	48.7041	50.0508	32.7839	25.5696	44.03
DoHDA4	3.65898	6.63397	3.82205	15.48	9.3861
DoHDA5	40.988	18.8749	23.4787	19.7614	30.9352
DoHDA6	16.8817	16.1722	19.7178	15.4677	28.0963
DoHDA7	58.9647	55.4208	46.7602	32.4564	66.7215
DoHDA8	4.30683	7.75609	9.95728	8.83257	6.42159
DoHDA9	22.6395	26.1058	27.4099	24.7172	19.5424
DoHDA10	1.78868	0.523035	0	0	0.063428
DoHDT3	67.7049	61.7604	54.6477	33.9204	56.9215
DoHDT4	1.38236	0.167747	0	0	8.59677
DoSRT1	14.8488	10.0579	10.7947	6.68838	10.6832
DoSRT2	5.5189	8.57991	10.4213	18.6946	13.2195

## Sheet: z-score
z-score normalized with FKPM values
#gene	Wr	Gr	St	Le	Fb
DoHDA1	-0.7514	0.2391	-1.1038	1.46149	0.1546
DoHDA2	-1.03424	0.08104	1.06946	-0.99974	0.88348
DoHDA3	0.77091	0.86593	-0.60145	-1.45527	0.41988
DoHDA4	-0.97203	-0.04655	-0.90755	1.3957	0.53043
DoHDA5	1.44187	-0.93823	-0.27522	-0.79937	0.57096
DoHDA6	-0.44115	-0.61583	0.19408	-0.7966	1.65949
DoHDA7	0.54965	0.32652	-0.28383	-1.58754	0.9952
DoHDA8	-1.53857	0.23024	1.02237	0.63981	-0.35385
DoHDA9	-0.41385	0.65673	1.0244	0.24529	-1.51257
DoHDA10	1.64179	0.27019	-0.68381	-0.68381	-0.54436
DoHDT3	0.87492	0.5303	0.07225	-1.70222	0.22475
DoHDT4	0.21856	-0.51941	-0.67992	-0.67992	1.66068
DoSRT1	1.30549	-0.08997	0.1601	-1.49892	0.1233
DoSRT2	-1.36327	-0.43647	-0.01319	1.29856	0.51437
