# Supplementary material for: Identification of histone deacetylase genes in Dendrobium officinale and their expression profiles under phytohormone and abiotic stress treatments
Source: PeerJ journal article supplement (doi:10.7717/peerj.10482), 2020-12-15
Supplement: Data_S1.zip [file File 3. qRT-PCR DATA summary.xlsx]

## Sheet: GA3
qRT-PCR DATA summary
		GA3 treatment
		Roots		Stems		Leaves
		Relative expression level	Standard Deviation	Relative expression level	Standard Deviation	Relative expression level	Standard Deviation
DoHDA1	0 h	1	0.164734	1	0.0197986	1	0.290533
	2 h	1.51572	0.193915	0.439317	0.03815	1.44393	0.0319992
	4 h	3.75809	0.630041	0.450625	0.0602404	0.82169	0.112611
	8 h	0.974905	0.134642	0.179867	0.0113174	0.982821	0.223023
	12 h	0.974905	0.22125	1.86391	0.188326	1.64718	0.313735
	24 h	2.32141	0.448152	1.0693	0.108187	2.68515	0.171185
DoHDA2	0 h	1	0.342983	1	0.0318812	1	0.0614403
	2 h	1.9816	0.268752	0.959264	0.0758376	1.53156	0.202347
	4 h	6.98858	1.09035	1.12896	0.244129	0.92445	0.153865
	8 h	1.66248	0.226065	0.614861	0.0863367	1.35191	0.473747
	12 h	1.6358	0.409455	4.12197	0.416476	1.67791	0.311249
	24 h	1.77154	0.089446	2.0586	0.353367	1.63769	0.0299444
DoHDA4	0 h	1	0.133428	1	0.297588	1	0.361976
	2 h	3.4066	0.398175	0.159873	0.00575155	0.846745	0.0341294
	4 h	6.84476	0.983269	0.215387	0.0445501	0.418994	0.090437
	8 h	1.44894	0.103996	0.082947	0.0191176	0.780967	0.131328
	12 h	1.63769	0.368748	0.824543	0.135628	0.758734	0.139213
	24 h	11.7533	0.533399	0.389582	0.0414219	1.28343	0.0141432
DoHDA5	0 h	1	0.116924	1	0.0689371	1	0.108927
	2 h	2.80565	1.07914	0.426317	0.0105766	1.70527	0.225298
	4 h	7.02095	0.957716	0.429779	0.0654047	1.06069	0.0843964
	8 h	2.62079	0.277271	0.551589	0.040669	0.799221	0.124592
	12 h	1.50699	0.38519	2.23199	0.274144	2.71008	0.458415
	24 h	1.75727	0.095115	0.771105	0.0706606	5.57897	0.0614797
DoHDA6	0 h	1	0.114352	1	0.0448136	1	0.0314839
	2 h	1.75119	0.171078	0.481297	0.0284185	1.48452	0.629369
	4 h	2.70695	0.144555	0.598739	0.105026	1.08673	0.142263
	8 h	1.51047	0.109806	0.379806	0.0483053	0.967053	0.181026
	12 h	1.1487	0.180207	2.12874	0.358804	0.998845	0.267869
	24 h	0.895025	0.0226501	0.497695	0.0409839	0.624887	0.0105493
DoHDA7	0 h	1	0.181674	1	0.0542067	1	0.114352
	2 h	1.88993	0.323909	1.04247	0.0206394	1.65099	0.170186
	4 h	2.37841	0.320694	1.12246	0.273804	1.62826	0.220015
	8 h	1.44393	0.231978	1.14076	0.195951	1.18099	0.25314
	12 h	1.50177	0.390976	3.79298	0.400115	1.85318	0.477188
	24 h	2.85799	0.417818	2.03496	0.281115	3.59253	0.506071
DoHDA8	0 h	1	0.113857	1	0.0359757	1	0.0665898
	2 h	2.75745	0.305182	0.687771	0.0439892	2.13613	0.115793
	4 h	20.7494	1.0894	0.802923	0.348995	0.998845	0.13171
	8 h	2.18354	0.175457	0.424352	0.0565128	0.873573	0.209886
	12 h	1.41585	0.324606	3.00702	0.303823	1.5245	0.302836
	24 h	5.74245	0.580207	1.72907	0.141054	1.34257	0.331401
DoHDA9	0 h	1	0.113981	1	0.0448136	1	0.0232554
	2 h	2.81539	0.25869	0.816014	0.061047	1.28937	0.114371
	4 h	7.18506	0.846187	1.00231	0.181126	1.12506	0.0760278
	8 h	3.14923	0.244102	0.594604	0.0437685	0.721965	0.143607
	12 h	1.62638	0.358601	2.14851	0.197093	1.25992	0.22005
	24 h	3.1748	0.216815	3.06312	0.288385	2.71008	0.184022
DoHDA10	0 h	1	0.117851	1	0.0841911	1	0.00985078
	2 h	3.67226	0.544106	0.752623	0.0481371	4.82323	0.825924
	4 h	34.3761	2.73522	3.23403	0.809359	2.88786	0.623325
	8 h	4.28709	0.382909	0.632878	0.129466	0.837987	0.213098
	12 h	2.17347	0.594919	26.3549	1.13495	16.7374	1.21675
	24 h	4.40253	0.301797	1.70921	0.183892	30.803	0.339446
DoHDT4	0 h	1	0.494715	1	0.0281138	1	0.0875164
	2 h	1.14737	0.114502	0.406126	0.0514381	2.62989	0.304613
	4 h	8.02777	0.931798	1.7818	0.212124	4.36203	0.566194
	8 h	1.07549	0.351685	0.24429	0.0233421	0.496546	0.07584
	12 h	0.837987	0.232467	44.6318	2.56518	27.379	1.61053
	24 h	4.34694	1.09962	2.61172	0.216921	74.028	6.05128
DoSRT1	0 h	1	0.121578	1	0.126656	1	0.0981633
	2 h	0.621288	0.0577323	0.237336	0.0339723	1.13682	0.234142
	4 h	5.01066	0.252991	0.223498	0.0652545	0.0927827	0.0216238
	8 h	0.273573	0.0323506	0.00926924	0.0010469	0.0103087	0.0017142
	12 h	0.0819943	0.0516458	1.58924	0.160573	0.0458585	0.00930843
	24 h	2.18102	0.0445235	0.115423	0.0108668	0.776469	0.0927481
DoSRT2	0 h	1	0.209651	1	0.0221612	1	0.0221612
	2 h	1.79419	0.193035	0.578344	0.0259177	2.00463	0.165076
	4 h	1.65864	0.145931	28.9401	3.10735	0.982821	0.0618398
	8 h	1.28343	0.0916381	0.860551	0.153144	1.10829	0.220422
	12 h	1.2086	0.331172	7.42985	0.663609	1.09936	0.142045
	24 h	0.906471	0.0802672	0.93088	0.155104	2.00694	0.117608

## Sheet: SA
qRT-PCR DATA summary
		SA treatment
		Roots		Stems		Leaves
		Relative expression level	Standard Deviation	Relative expression level	Standard Deviation	Relative expression level	Standard Deviation
DoHDA1	0 h	1	0.164734	1	0.0197986	1	0.290533
	2 h	4.06053	0.301586	0.257623	0.0337061	1.45397	0.212708
	4 h	1.89212	0.490698	1.18509	0.186706	3.45815	0.36965
	8 h	1.18099	0.271578	1.91853	0.231744	0.14492	0.0175623
	12 h	0.939523	0.220488	0.0741539	0.0284234	0.399611	0.0450669
	24 h	0.869545	0.127705	0.400998	0.0866626	1.82134	0.243809
DoHDA2	0 h	1	0.342983	1	0.0318812	1	0.0614403
	2 h	9.20021	0.696467	0.306013	0.0400147	2.55502	0.364588
	4 h	2.36745	0.617896	3.82378	0.54773	4.16986	0.294082
	8 h	0.756109	0.165263	2.45377	0.313373	0.39685	0.0566558
	12 h	2.24233	0.687485	0.222982	0.0728143	0.825496	0.0734777
	24 h	0.82264	0.193732	0.953739	0.203185	0.929805	0.0429795
DoHDA4	0 h	1	0.133428	1	0.297588	1	0.361976
	2 h	7.56846	0.274933	0.37156	0.0470039	6.52058	1.35406
	4 h	1.63769	0.305157	0.399149	0.0664098	1.57462	0.221867
	8 h	1.09177	0.192683	0.869545	0.154644	0.0770355	0.0137933
	12 h	1.06437	0.31738	0.0503569	0.0180721	0.206374	0.0222304
	24 h	11.1065	1.82724	0.662044	0.161312	4.51586	0.661553
DoHDA5	0 h	1	0.116924	1	0.0689371	1	0.108927
	2 h	16.8733	2.09786	0.27389	0.0271803	2.46514	0.368194
	4 h	2.71008	0.714377	2.09217	0.299689	3.58424	0.69301
	8 h	1.02219	0.200279	1.13419	0.313024	0.369847	0.0504765
	12 h	3.30198	0.747066	0.17374	0.0570863	0.764012	0.0750338
	24 h	0.991946	0.155489	0.481854	0.113612	1.67791	0.0908198
DoHDA6	0 h	1	0.114352	1	0.0448136	1	0.0314839
	2 h	3.16382	0.216065	0.672062	0.0622516	1.55294	0.803389
	4 h	2.65737	0.450613	1.19334	0.196692	1.74311	0.203105
	8 h	1.82344	0.375091	0.961483	0.275901	0.461158	0.0541251
	12 h	2.62989	0.76359	0.297302	0.149157	0.543367	0.0884759
	24 h	1.35974	0.153234	0.411796	0.0860605	1.06437	0.070239
DoHDA7	0 h	1	0.181674	1	0.0542067	1	0.114352
	2 h	4.18434	0.276967	1.0293	0.148668	2.14355	0.294981
	4 h	1.97247	0.351134	4.44341	0.656145	2.15348	0.392815
	8 h	1.60585	0.28448	1.95432	0.434062	0.656712	0.142368
	12 h	2.79917	0.654743	0.560583	0.207342	1.51397	0.197801
	24 h	1.85104	0.205569	1.69545	0.373455	2.22684	0.387819
DoHDA8	0 h	1	0.113857	1	0.0359757	1	0.0665898
	2 h	17.1682	0.75782	0.198425	0.0277793	2.41162	0.34816
	4 h	4.34192	1.05626	2.63597	0.739859	6.15461	0.557195
	8 h	1.66632	0.300833	1.34412	0.328181	0.370702	0.0619016
	12 h	5.44526	1.22857	0.141284	0.0477176	0.762249	0.0795973
	24 h	2.46229	1.06255	1.4811	0.318873	1.09429	0.0964481
DoHDA9	0 h	1	0.113981	1	0.0448136	1	0.0232554
	2 h	9.04216	0.566412	0.375443	0.0311626	1.43396	0.272495
	4 h	3.62589	0.729446	2.12138	0.345748	3.97696	0.249122
	8 h	1.78592	0.347473	1.49485	0.333614	0.300062	0.0433091
	12 h	3.71493	0.952741	0.222211	0.0720852	0.670511	0.0691172
	24 h	1.66248	0.168885	1.52626	0.313091	1.51047	0.368625
DoHDA10	0 h	1	0.117851	1	0.0841911	1	0.00985078
	2 h	8.40744	0.295481	0.716978	0.0687829	9.51366	1.53377
	4 h	3.94493	0.700221	6.08392	0.890654	4.25748	0.556086
	8 h	0.609909	0.124641	1.73708	0.326467	0.146604	0.0213189
	12 h	2.1116	0.553644	0.263645	0.0861916	1.15136	0.197225
	24 h	2.01624	0.204823	2.37841	0.486791	18.2733	0.887691
DoHDT4	0 h	1	0.494715	1	0.0281138	1	0.0875164
	2 h	2.91804	0.524652	0.449585	0.0604583	0.936272	0.70865
	4 h	3.24526	0.854609	13.9772	1.822	2.16095	0.348115
	8 h	0.855595	0.157706	1.20581	0.260206	0.228194	0.0317078
	12 h	1.25701	0.321989	0.178006	0.057705	1.04367	0.146404
	24 h	1.17691	0.224549	0.801996	0.244409	25.753	0.993689
DoSRT1	0 h	1	0.121578	1	0.126656	1	0.0981633
	2 h	2.45377	0.688923	0.103187	0.00971985	10.2319	1.60322
	4 h	0.0537845	0.0274937	0.0667541	0.0118353	0.431271	0.258305
	8 h	0.0773029	0.0156487	0.141284	0.0146399	0.00426965	0.00147017
	12 h	0.0285572	0.00637467	0.00424506	0.00187809	0.0356077	0.00880069
	24 h	2.89454	1.3522	0.166086	0.00900295	2.77984	0.563458
DoSRT2	0 h	1	0.209651	1	0.0221612	1	0.0221612
	2 h	4.21344	0.167145	0.928731	0.10263	0.673617	0.101499
	4 h	13.5323	2.31444	7.59474	1.34652	3.93583	0.242379
	8 h	0.899171	0.158144	4.64818	1.13935	0.13742	0.0189885
	12 h	1.85961	0.433136	0.812252	0.274931	1.18099	0.110207
	24 h	0.848704	0.128271	1.00231	0.218977	1.06069	0.0385307

## Sheet: ABA
qRT-PCR DATA summary
		ABA treatment
		Roots		Stems		Leaves
		Relative expression level	Standard Deviation	Relative expression level	Standard Deviation	Relative expression level	Standard Deviation
DoHDA1	0 h	1	0.164734	1	0.0197986	1	0.290533
	2 h	0.933033	0.12853	0.185565	0.0152605	0.514057	0.0504856
	4 h	6.23332	0.0433561	0.582367	0.0240197	1.67404	0.0756561
	8 h	0.592546	0.0981006	0.240371	0.0409177	0.707107	0.0650072
	12 h	0.874583	0.0966467	0.680657	0.0168866	0.598739	0.0957427
	24 h	1.52626	0.170337	0.604997	0.133944	1.52626	0.213249
DoHDA2	0 h	1	0.342983	1	0.0318812	1	0.0614403
	2 h	0.93088	0.131163	0.362236	0.0353023	0.556068	0.0414673
	4 h	4.30198	0.286468	2.10672	0.176687	1.28937	0.113175
	8 h	2.4005	0.0852257	1.01983	0.118208	1.07425	0.108688
	12 h	1.31951	0.084937	0.82645	0.159481	0.524858	0.0866542
	24 h	2.00694	0.226755	0.949342	0.462717	1.08673	0.0900832
DoHDA4	0 h	1	0.133428	1	0.297588	1	0.361976
	2 h	3.17114	0.425984	0.247414	0.0207502	0.511096	0.0556502
	4 h	11.6722	0.529715	0.427798	0.11358	0.865537	0.0498771
	8 h	0.741405	0.0590755	1.31342	0.271497	0.666649	0.0361368
	12 h	1.5966	0.26496	0.0940779	0.00328373	0.378492	0.0763225
	24 h	2.56685	1.17544	0.31864	0.106424	0.515842	0.0305724
DoHDA5	0 h	1	0.116924	1	0.0689371	1	0.108927
	2 h	0.914888	0.11539	0.161358	0.0168065	0.420934	0.0283351
	4 h	6.58873	0.486189	1.11342	0.0581821	1.6644	0.0308049
	8 h	2.68515	0.148108	3.32879	0.297995	1.40444	0.0154768
	12 h	3.97237	0.241503	1.3333	0.0620004	0.750019	0.12574
	24 h	1.89212	0.228479	0.317538	0.0736226	2.33755	0.117424
DoHDA6	0 h	1	0.114352	1	0.0448136	1	0.0314839
	2 h	3.00008	0.576242	0.61132	0.0767308	0.761368	0.0533116
	4 h	5.30861	0.097065	0.861546	0.0230426	0.856584	0.134108
	8 h	1.27899	0.0407756	1.65099	0.157277	1.18099	0.184144
	12 h	1.58008	0.08178	0.510506	0.0637259	0.562529	0.0899525
	24 h	3.06312	0.338363	0.432269	0.0949711	0.740549	0.0892195
DoHDA7	0 h	1	0.181674	1	0.0542067	1	0.114352
	2 h	1.0163	0.136888	0.735433	0.060561	0.668964	0.0501258
	4 h	5.0806	0.60018	0.716978	0.0819878	1.1355	0.0866935
	8 h	2.02324	0.0955648	2.15846	0.302783	1.17283	0.0668728
	12 h	1.66248	0.217755	2.15846	0.0427344	0.852635	0.146307
	24 h	1.78386	0.268613	0.817902	0.302473	1.53333	0.247581
DoHDA8	0 h	1	0.113857	1	0.0359757	1	0.0665898
	2 h	1.4914	0.195127	0.214146	0.00999752	0.272627	0.0382434
	4 h	155.417	22.0061	1.49485	0.226417	0.671286	0.0174237
	8 h	2.57874	0.157702	2.59668	0.311199	0.879649	0.0859768
	12 h	1.34257	0.33058	0.545254	0.0302038	0.895025	0.15556
	24 h	3.11666	0.357166	0.965936	0.246212	2.2217	0.171693
DoHDA9	0 h	1	0.113981	1	0.0448136	1	0.0232554
	2 h	0.816958	0.107367	0.257623	0.0167235	0.36942	0.0343642
	4 h	11.0425	0.72871	0.952638	0.0211116	1.42734	0.0478888
	8 h	2.91804	0.217954	2.88452	0.659672	1.03526	0.0445826
	12 h	2.66352	0.177716	1.31951	0.190629	0.529732	0.0848405
	24 h	2.46229	0.963147	0.760489	0.166689	2.52567	0.182523
DoHDA10	0 h	1	0.117851	1	0.0841911	1	0.00985078
	2 h	6.42338	0.596251	0.284533	0.0296361	0.392292	0.00386438
	4 h	74.9748	0.368375	53.4456	16.2446	3.10947	0.112593
	8 h	0.675175	0.0628726	11.1065	1.47183	0.558644	0.0310766
	12 h	2.37567	0.556688	14.0907	1.93408	1.1607	0.189175
	24 h	1.99078	0.328313	1.95206	0.411185	1.27899	0.0499091
DoHDT4	0 h	1	0.494715	1	0.0281138	1	0.0875164
	2 h	0.337587	0.0484147	0.210224	0.00661868	0.362236	0.0149404
	4 h	32.4467	0.662371	2.45377	1.26856	5.74245	0.11606
	8 h	1.02456	0.31141	0.424842	0.243493	0.692555	0.0566115
	12 h	1.13288	0.0560281	24.4201	0.483485	0.554785	0.156863
	24 h	0.541488	0.058773	2.01391	0.457724	0.662044	0.0713434
DoSRT1	0 h	1	0.121578	1	0.126656	1	0.0981633
	2 h	0.22688	0.0240929	0.0328036	0.00118013	0.108819	0.00612947
	4 h	11.7127	1.1448	0.228458	0.0336976	0.0490932	0.00363743
	8 h	0.183646	0.00374897	3.44618	0.497518	0.0455944	0.00300883
	12 h	0.036906	0.0319763	0.00975258	0.00798152	0.0153034	0.00281778
	24 h	0.481297	0.0993152	0.0527385	0.011125	0.0432847	0.0020008
DoSRT2	0 h	1	0.209651	1	0.0221612	1	0.0221612
	2 h	1.29235	0.119196	0.554785	0.0715165	0.721965	0.0227303
	4 h	1.18099	0.459142	5.67649	0.869209	1.56555	0.0851131
	8 h	1.08298	0.119629	15.9446	1.08683	1.38992	0.00682912
	12 h	1.57462	0.0727853	2.26577	0.38475	1.19334	0.190037
	24 h	1.56374	0.170333	0.709562	0.150325	1.47939	0.0577293

## Sheet: MeJA
qRT-PCR DATA summary
		MeJA treatment
		Roots		Stems		Leaves
		Relative expression level	Standard Deviation	Relative expression level	Standard Deviation	Relative expression level	Standard Deviation
DoHDA1	0 h	1	0.164734	1	0.0197986	1	0.290533
	2 h	1.40607	0.282537	0.858565	0.120855	2.50822	0.351149
	4 h	0.312805	0.0204324	1.15136	0.112642	1.45734	0.0751834
	8 h	0.361817	0.0503762	0.0423449	0.00628678	0.317905	0.0927607
	12 h	0.44803	0.0637932	0.115023	0.0208968	0.868541	0.151846
	24 h	10.2319	0.437575	0.946058	0.0239416	0.387786	0.0599678
DoHDA2	0 h	1	0.342983	1	0.0318812	1	0.0614403
	2 h	0.00214471	0.000364386	1.11342	0.154633	1.69349	0.156529
	4 h	0.417062	0.0380719	3.90413	0.303516	1.83613	0.0906479
	8 h	0.905425	0.0605912	0.546515	0.0437311	1.11729	0.330236
	12 h	1.08799	0.0492733	0.32722	0.0478923	1.13419	0.195995
	24 h	11.2746	0.936427	1.02101	0.0325511	0.903335	0.123608
DoHDA3	0 h	1	0.0462242	1	0.0558625	1	0.214695
	2 h	0.202361	0.0546356	1.95884	0.40662	0.68381	0.0769182
	4 h	0.615572	0.0550122	0.61132	0.0788727	1.33022	0.0271553
	8 h	0.164938	0.00409199	1.92297	0.154842	1.8025	0.126212
	12 h	0.29937	0.0236676	4.04648	0.202923	2.20636	0.295827
	24 h	0.248273	0.0542346	2.54618	0.373687	1.18921	0.279363
DoHDA4	0 h	1	0.133428	1	0.297588	1	0.361976
	2 h	2.62685	0.525769	1.65864	0.309013	3.0773	0.388592
	4 h	0.513463	0.0693804	0.572362	0.0328093	0.756983	0.0721845
	8 h	0.618423	0.0582833	0.0312139	0.00429105	0.224793	0.0642337
	12 h	0.972655	0.0946538	0.0844944	0.0116276	0.412272	0.0872068
	24 h	4.12673	0.783525	0.716978	0.0339305	0.194117	0.0242166
DoHDA5	0 h	1	0.116924	1	0.0689371	1	0.108927
	2 h	1.48452	0.283686	0.85165	0.129883	2.49955	0.356158
	4 h	0.66128	0.0361093	2.61776	0.316618	2.41999	0.0774701
	8 h	3.35195	0.238916	0.592546	0.0588583	1.42241	0.474152
	12 h	1.64718	0.0243989	0.300409	0.0467831	1.38351	0.262605
	24 h	23.4796	2.14335	1.67018	0.188288	1.14208	0.115968
DoHDA6	0 h	1	0.114352	1	0.0448136	1	0.0314839
	2 h	2.58172	0.449775	0.768438	0.210983	1.00231	0.116503
	4 h	1.07425	0.113036	1.01279	0.0533408	1.23114	0.0596981
	8 h	1.60956	0.0686736	0.516438	0.0504279	0.862542	0.256562
	12 h	0.940609	0.0577242	0.511687	0.0765273	0.850667	0.146925
	24 h	9.00047	0.608222	0.837987	0.223618	0.897095	0.138728
DoHDA7	0 h	1	0.181674	1	0.0542067	1	0.114352
	2 h	1.36762	0.275457	1.18921	0.233702	2.01624	0.191194
	4 h	0.802923	0.0697254	1.81924	0.3407	1.41095	0.0539753
	8 h	1.29534	0.0555254	0.842842	0.133399	1.37237	0.431914
	12 h	0.798298	0.136059	1.04488	0.163187	0.97041	0.199016
	24 h	8.34937	0.322164	0.70466	0.370192	0.985094	0.0922637
DoHDA8	0 h	1	0.113857	1	0.0359757	1	0.0665898
	2 h	1.28194	0.213715	0.393654	0.0733398	1.71515	0.28526
	4 h	0.587774	0.120635	4.99332	0.437257	1.97931	0.224702
	8 h	0.874583	0.0351591	0.205423	0.0401276	0.387338	0.139214
	12 h	0.495973	0.0246151	0.203533	0.0357258	1.88993	0.367354
	24 h	84.7417	10.3721	2.28153	0.118084	0.848704	0.088057
DoHDA9	0 h	1	0.113981	1	0.0448136	1	0.0232554
	2 h	1.34257	0.230139	0.997692	0.165873	1.27751	0.144393
	4 h	0.464366	0.0383155	2.71948	0.135674	1.29235	0.0530358
	8 h	1.79834	0.118554	0.482968	0.0413822	0.720298	0.215542
	12 h	1.1607	0.0336505	0.757858	0.11087	0.74312	0.128415
	24 h	23.0229	0.667469	3.26029	0.560894	1.09177	0.137948
DoHDA10	0 h	1	0.117851	1	0.0841911	1	0.00985078
	2 h	0.872564	0.152651	9.78112	1.48341	15.4907	1.62312
	4 h	1.10318	0.202443	2.03967	0.0946594	1.09936	0.14007
	8 h	1.48452	0.123702	0.294567	0.0538482	2.66044	0.817652
	12 h	0.595291	0.0255766	0.441351	0.0835796	2.67895	0.541259
	24 h	25.7827	1.61145	8.81524	0.223085	1.31342	0.179722
DoHDT3	0 h	1	0.14562	1	0.0838683	1	0.063338
	2 h	0.440333	0.0765707	1.60214	0.299954	0.873573	0.230916
	4 h	0.42681	0.0458273	0.655197	0.0714529	0.776469	0.0413386
	8 h	0.152301	0.0122636	1.217	0.0944724	0.65444	0.0796165
	12 h	0.277713	0.0912647	1.86822	0.210303	1.43893	0.158032
	24 h	0.138376	0.030395	2.03967	0.320305	0.844791	0.118535
DoHDT4	0 h	1	0.494715	1	0.0281138	1	0.0875164
	2 h	0.467596	0.0991574	11.4452	1.74101	39.8544	4.70167
	4 h	1.16608	0.0663094	0.686977	0.141155	1.18509	0.105969
	8 h	0.388234	0.0747074	0.128366	0.010422	3.95863	0.537166
	12 h	0.162668	0.00240952	0.187288	0.0404343	5.18736	1.51151
	24 h	11.8762	4.54142	6.40856	0.715223	0.764895	0.152369
DoSRT1	0 h	1	0.121578	1	0.126656	1	0.0981633
	2 h	0.197282	0.0352275	0.528509	0.0890813	2.33216	0.438306
	4 h	0.0768577	0.0261656	0.0989836	0.0196942	0.1332	0.0389307
	8 h	0.271057	0.0125042	0.0169019	0.00446631	0.288505	0.0863494
	12 h	0.00510101	9.09456e-05	0.00663816	0.0010917	0.0320544	0.00647633
	24 h	6.35694	1.06784	2.92817	0.358058	0.246274	0.0218452
DoSRT2	0 h	1	0.209651	1	0.0221612	1	0.0221612
	2 h	1.24401	0.259762	0.909618	0.258633	1.17827	0.143343
	4 h	1.42734	0.074822	3.58838	0.179023	2.54324	0.102241
	8 h	0.581023	0.0772508	0.601513	0.0597489	0.824543	0.249918
	12 h	0.90125	0.0517987	1.27456	0.175397	2.16845	0.591624
	24 h	4.82323	0.229565	1.64528	0.316108	0.544624	0.0491416

## Sheet: NaCl
qRT-PCR DATA summary
		NaCl treatment
		Roots		Stems		Leaves
		Relative expression level	Standard Deviation	Relative expression level	Standard Deviation	Relative expression level	Standard Deviation
DoHDA1	0 h	1	0.164734	1	0.0197986	1	0.290533
	2 h	0.898132	0.0488998	0.737135	0.507776	1.47939	0.313417
	4 h	1.19334	0.036113	1.13682	0.118458	1.38032	0.0246096
	8 h	0.371131	0.0266373	0.202361	0.0050204	0.895025	0.118151
	12 h	1.26576	0.296514	0.117034	0.0132815	3.71922	0.256392
	24 h	0.962594	0.0257452	0.392292	0.0316102	2.74473	0.46919
DoHDA2	0 h	1	0.342983	1	0.0318812	1	0.0614403
	2 h	1.1355	0.0664567	0.408951	0.0309098	0.989657	0.112802
	4 h	2.47084	0.134527	4.02782	0.266606	2.25793	0.173838
	8 h	1.56193	0.111135	0.959264	0.0503641	1.04972	0.135317
	12 h	1.39959	0.340413	0.50874	0.0526702	1.06069	0.187689
	24 h	3.24901	0.0941936	1.54756	0.0603898	1.10701	0.0223737
DoHDA4	0 h	1	0.133428	1	0.297588	1	0.361976
	2 h	1.76541	0.0816045	0.158769	0.0113954	23.4254	4.36036
	4 h	1.29086	0.0388854	0.835088	0.0207179	1.7593	0.0725622
	8 h	0.70466	0.0505759	0.102238	0.00182279	0.613442	0.0794887
	12 h	2.08493	0.785246	0.114626	0.0118054	0.249135	0.018429
	24 h	1.12896	0.44029	0.168404	0.00948576	0.392746	0.013661
DoHDA5	0 h	1	0.116924	1	0.0689371	1	0.108927
	2 h	1.38511	0.0462978	0.287175	0.0208767	1.19748	0.333219
	4 h	6.06287	0.440751	2.38667	0.0372798	2.51403	0.530323
	8 h	2.38667	0.1713	0.835088	0.0279131	1.31951	0.164864
	12 h	2.37019	0.520389	0.481297	0.0557474	8.31087	0.37244
	24 h	2.9897	0.0799615	0.474671	0.0120124	2.92141	0.114634
DoHDA6	0 h	1	0.114352	1	0.0448136	1	0.0314839
	2 h	1.84676	0.0617287	0.380245	0.0276426	1.95884	0.512444
	4 h	2.64818	0.0801398	2.32947	0.0675347	1.42405	0.0587349
	8 h	1.6529	0.11771	0.806642	0.0125997	0.885768	0.118571
	12 h	3.61752	0.740867	0.911722	0.0978534	0.584389	0.0708425
	24 h	2.39496	0.267288	1.02456	0.108935	0.37156	0.0920099
DoHDA7	0 h	1	0.181674	1	0.0542067	1	0.114352
	2 h	1.80876	0.223491	0.641713	0.0474688	1.64148	0.251351
	4 h	2.28153	0.11461	4.06992	0.602349	1.07923	0.0445127
	8 h	1.24833	0.0923414	0.952638	0.0276184	1.00347	0.125378
	12 h	2.02792	0.527866	0.942785	0.106991	6.38639	0.637625
	24 h	3.02095	0.198749	1.3566	0.784803	3.74942	0.065978
DoHDA8	0 h	1	0.113857	1	0.0359757	1	0.0665898
	2 h	1.09051	0.0330012	0.282241	0.022505	1.82766	0.266823
	4 h	2.57576	0.23795	2.93834	0.306179	6.89237	0.423469
	8 h	1.39959	0.105785	0.476319	0.00744009	1.56917	0.196058
	12 h	1.01396	0.249873	0.162668	0.0188414	0.554785	0.0113254
	24 h	2.69447	0.139457	0.671286	0.017954	0.973779	0.223464
DoHDA9	0 h	1	0.113981	1	0.0448136	1	0.0232554
	2 h	1.17283	0.0457669	0.456916	0.0432174	0.337978	0.0793882
	4 h	1.92964	0.0612648	2.14355	0.25808	1.23542	0.0571062
	8 h	1.87905	0.133815	0.882703	0.0137878	1.02811	0.132533
	12 h	2.09943	0.437739	0.34151	0.0368019	3.31728	0.762042
	24 h	3.3058	0.142361	1.38511	0.125677	2.09459	0.055694
DoHDA10	0 h	1	0.117851	1	0.0841911	1	0.00985078
	2 h	2.69136	0.195653	0.176777	0.0889873	7.46426	1.11585
	4 h	6.26943	0.289799	6.40856	0.243734	6.84476	2.38675
	8 h	1.42241	0.10751	0.624165	0.0358735	1.74715	0.218295
	12 h	1.35035	0.278122	0.572362	0.059641	39.6706	1.28032
	24 h	3.46615	0.53779	1.28788	0.0725429	40.1316	3.77634
DoHDT4	0 h	1	0.494715	1	0.0281138	1	0.0875164
	2 h	0.694959	0.0349105	0.26334	0.0199041	12.1678	5.59628
	4 h	2.70382	0.135824	3.38698	0.37111	8.9383	1.36867
	8 h	0.175556	0.014921	0.244855	0.00514493	1.79005	0.223656
	12 h	0.423373	0.164145	0.784584	0.123085	113.378	26.0451
	24 h	0.560583	0.0162521	1.61888	0.492912	65.4203	2.27554
DoSRT1	0 h	1	0.121578	1	0.126656	1	0.0981633
	2 h	0.20805	0.00695413	0.0833312	0.0125644	19.5622	2.41711
	4 h	0.0833312	0.0336822	0.343885	0.111011	2.49666	0.0445128
	8 h	0.121582	0.0133528	0.0123017	0.000894293	0.0286564	0.00389467
	12 h	0.121161	0.0294693	0.0473661	0.00497982	0.732043	0.0295062
	24 h	0.142102	0.0361739	0.0287559	0.00101407	0.227142	0.0576356
DoSRT2	0 h	1	0.209651	1	0.0221612	1	0.0221612
	2 h	2	0.0719514	0.792784	0.0576328	0.416099	0.194237
	4 h	1.68179	0.146922	28.2465	3.48031	2.24233	0.172637
	8 h	0.837987	0.0886563	1.00347	0.0178908	1.06069	0.133497
	12 h	2.2974	0.471042	1.28343	0.132182	1.63014	0.345356
	24 h	2.83825	0.159871	0.90125	0.0726211	1.13419	0.0445049

## Sheet: PEG-6000
qRT-PCR DATA summary
		PEG-6000 treatment
		Roots		Stems		Leaves
		Relative expression level	Standard Deviation	Relative expression level	Standard Deviation	Relative expression level	Standard Deviation
DoHDA1	0 h	1	0.164734	1	0.0197986	1	0.290533
	2 h	1.74715	0.151812	2.15099	0.171513	2.65737	0.97968
	4 h	54.3798	4.8598	0.411796	0.018454	1.60399	0.174856
	8 h	0.747425	0.114812	0.241484	0.0204085	1.70921	0.0749484
	12 h	0.884745	0.0355677	0.959264	0.0807615	2.01857	0.148097
	24 h	1.79212	0.0811621	0.50698	0.056709	0.925518	0.0632058
DoHDA2	0 h	1	0.342983	1	0.0318812	1	0.0614403
	2 h	1.7411	0.248327	2.87123	0.205366	0.888843	0.0366603
	4 h	10.8153	0.119183	0.858565	0.0213003	1.99308	0.232069
	8 h	1.84038	0.0533552	0.279322	0.0112585	3.36359	0.168966
	12 h	1.76541	0.0173906	1.67018	0.27651	1.84676	0.0558873
	24 h	1.68179	0.0763244	1.47427	0.141363	0.97942	0.0283949
DoHDA3	0 h	1	0.126807	1	0.0558625	1	0.0873606
	2 h	1.59107	0.427542	11.5115	4.14388	15.6707	1.84555
	4 h	2.49666	0.491841	31.233	2.56853	14.2215	1.84279
	8 h	0.66281	0.0446169	1.51397	0.149396	52.5275	7.18944
	12 h	0.852635	0.191817	19.2707	3.3113	3.03143	0.201259
	24 h	2.31338	0.512002	7.33603	1.74423	4.34694	0.0860633
DoHDA4	0 h	1	0.133428	1	0.297588	1	0.361976
	2 h	17.1484	0.733365	3.97237	0.452773	11.3137	0.201711
	4 h	1.61328	0.158365	0.239816	0.00489563	0.858565	0.0857202
	8 h	1.12896	0.0327304	0.112656	0.00793806	0.366445	1.51685
	12 h	2.8481	0.308764	0.404721	0.0425502	0.204476	0.0111329
	24 h	2.41162	0.119269	0.292194	0.0326838	0.694959	0.0108552
DoHDA5	0 h	1	0.116924	1	0.0689371	1	0.108927
	2 h	3.82378	0.280076	3.605	0.4109	2.08493	0.0371721
	4 h	14.8769	0.146549	0.496546	0.0293189	2.32141	0.226894
	8 h	3.18215	0.579464	0.272942	0.0159131	4.83998	0.471688
	12 h	4	0.0196533	1.85961	0.0833358	5.6962	0.22228
	24 h	1.39474	0.0950696	0.615572	0.137545	1.12117	0.0533627
DoHDA6	0 h	1	0.114352	1	0.0448136	1	0.0314839
	2 h	3.6217	0.258143	1.11729	0.185282	1.07177	0.311386
	4 h	2.92817	0.0288448	0.587774	0.0418213	1.18921	0.117571
	8 h	1.52626	0.217371	0.460094	0.0345298	2.10672	0.0637542
	12 h	2.35381	0.011565	1.89212	0.0419316	0.301452	0.0769586
	24 h	1.56917	0.140473	0.558644	0.0624879	1.10573	0.058054
DoHDA7	0 h	1	0.181674	1	0.0542067	1	0.114352
	2 h	2.77663	0.286968	4.82323	0.594281	2.72263	0.125851
	4 h	4.59479	0.626441	1.39474	0.027614	1.68763	0.165663
	8 h	1.64909	0.0647088	0.972655	0.0343006	3.69353	0.123457
	12 h	1.52979	0.162586	2.07772	0.391575	4.12673	0.224684
	24 h	1.41421	0.0641809	1.93858	0.179087	1.52626	0.0580475
DoHDA8	0 h	1	0.113857	1	0.0359757	1	0.0665898
	2 h	2.65737	0.269347	1.6529	0.391035	1.58557	0.0221337
	4 h	2.04202	0.125463	0.816014	0.182788	1.89868	0.1981
	8 h	2.80565	0.073271	0.216885	0.0215333	6.34227	0.373075
	12 h	2.15099	0.377622	1.55294	0.0317018	0.632148	0.0284492
	24 h	2.61172	0.120725	0.879649	0.215876	0.835088	0.123593
DoHDA9	0 h	1	0.113981	1	0.0448136	1	0.0232554
	2 h	1.95206	0.386736	4.46915	0.346411	1.44894	0.41183
	4 h	7.49018	0.253174	0.790041	0.0191995	2.25793	0.233461
	8 h	3.12748	0.065715	0.484645	0.0259201	3.04547	0.227836
	12 h	1.19334	0.361581	1.30134	0.109561	1.80667	0.124431
	24 h	1.85318	0.0856616	2.16345	0.206094	1.18509	0.11088
DoHDA10	0 h	1	0.117851	1	0.0841911	1	0.00985078
	2 h	3.83263	0.333023	44.4774	3.54649	28.443	0.630331
	4 h	55.0753	1.22054	2.57576	0.10382	1.81504	0.197004
	8 h	2.2868	0.325688	0.744839	0.0259981	8.4855	0.283631
	12 h	1.91631	0.0864238	6.04189	0.192623	73.2623	4.64029
	24 h	0.940609	0.0436529	2.13613	0.232682	6.34227	2.33983
DoHDT4	0 h	1	0.494715	1	0.0281138	1	0.0875164
	2 h	1.38992	0.0792504	75.5835	5.42489	190.459	33.9762
	4 h	71.259	2.24351	2.05623	0.152103	1.21419	0.166187
	8 h	0.503478	0.00897647	0.218393	0.0153886	3.56771	0.617256
	12 h	1.39959	0.0277098	10.2319	0.914399	96.3358	7.0033
	24 h	0.607097	0.0280626	7.1602	0.262589	6.77396	2.40874
DoSRT1	0 h	1	0.121578	1	0.126656	1	0.0981633
	2 h	7.86256	0.316913	3.03143	0.87852	14.5707	0.458744
	4 h	0.0710511	0.00473127	0.0350364	0.00276991	0.147113	0.0244765
	8 h	0.192109	0.0129821	0.000983355	0.000187996	0.417544	0.0264464
	12 h	0.0902456	0.02172	0.283876	0.124011	0.214641	0.0156037
	24 h	0.0264914	0.00508115	0.288172	0.035069	0.867539	0.542131
DoSRT2	0 h	1	0.209651	1	0.0221612	1	0.0221612
	2 h	1.38511	0.154234	8.87656	0.729988	1.97931	0.325514
	4 h	6.23332	0.712792	0.858565	0.0994454	2.21146	0.217084
	8 h	1.22688	0.041009	0.976032	0.116934	1.97247	0.0837622
	12 h	2.89788	0.160526	3.68075	0.132418	1.20999	0.244026
	24 h	0.82932	0.0376368	5.1337	0.767452	2.2974	0.458436

## Sheet: cold (4℃)
qRT-PCR DATA summary
		cold (4℃) treatment
		Roots		Stems		Leaves
		Relative expression level	Standard Deviation	Relative expression level	Standard Deviation	Relative expression level	Standard Deviation
DoHDA1	0 h	1	0.113193	1	0.104424	1	0.0497167
	6 h	1.11987	0.0758236	0.646923	0.146084	0.491978	0.0484096
	12 h	0.941696	0.190188	0.320856	0.0460481	1.26284	0.187362
	24 h	0.642455	0.131575	0.569066	0.0583519	1.06069	0.0535548
	48 h	1.27603	0.330897	0.516438	0.0970593	0.855595	0.0541917
DoHDA2	0 h	1	0.0397763	1	0.0800181	1	0.0574743
	6 h	0.750886	0.147243	0.509917	0.070549	0.296273	0.0263865
	12 h	0.647671	0.0777228	0.310644	0.042661	1.55294	0.261611
	24 h	1.30586	0.190644	1.13027	0.0974409	1.30586	0.208694
	48 h	0.439825	0.0479087	0.215138	0.0317329	1.29235	0.17912
DoHDA3	0 h	1	0.145384	1	0.209753	1	0.130761
	6 h	2.81539	0.186729	0.267016	0.0420672	2.4909	0.372865
	12 h	0.873573	0.0473535	0.61132	0.277751	1.26722	0.950441
	24 h	2.0209	0.16486	0.358489	0.0523724	3.04899	0.270924
	48 h	5.83608	0.197265	0.959264	0.0345102	1.38671	0.151763
DoHDA4	0 h	1	0.0525851	1	0.10145	1	0.0893676
	6 h	1.56555	0.148229	0.906471	0.17529	0.356013	0.031707
	12 h	0.968171	0.0632411	0.392292	0.182612	1.06437	0.157527
	24 h	0.690159	0.0665728	0.920188	0.137257	0.908568	0.067318
	48 h	1.01045	0.0180153	0.754364	0.135373	0.791869	0.125855
DoHDA5	0 h	1	0.0653202	1	0.0797932	1	0.0452883
	6 h	1.00231	0.118846	0.293548	0.0403235	0.281915	0.0240508
	12 h	0.698985	0.0326325	0.220166	0.0348463	1.07425	0.208778
	24 h	0.934111	0.113238	0.353553	0.0390998	0.58304	0.0278552
	48 h	0.908568	0.0330048	0.217638	0.0327933	0.824543	0.121013
DoHDA6	0 h	1	0.0742727	1	0.0820182	1	0.0992846
	6 h	0.99654	0.150875	2.38392	0.353058	0.484645	0.0619309
	12 h	0.943874	0.0420274	0.955945	0.122551	0.742262	0.204498
	24 h	1.85746	0.21002	0.958157	0.139495	0.913831	0.0894469
	48 h	1.07301	0.0442564	0.711203	0.181612	0.854607	0.152455
DoHDA7	0 h	1	0.0742727	1	0.0795111	1	0.0515059
	6 h	0.99654	0.150875	0.875594	0.115009	0.433769	0.0411541
	12 h	0.943874	0.0420274	0.596668	0.0768265	0.876606	0.170366
	24 h	1.85746	0.21002	1.88993	0.137738	1.05336	0.0883436
	48 h	1.07301	0.0442564	0.906471	0.134791	1.4323	0.195988
DoHDA8	0 h	1	0.0996097	1	0.150547	1	0.274561
	6 h	0.99654	0.0953636	0.281915	0.0367805	0.0553605	0.00472292
	12 h	0.922316	0.0504364	0.257028	0.0720304	0.432269	0.0688789
	24 h	0.415619	0.0433637	0.708742	0.0692724	0.192776	0.0329249
	48 h	0.306367	0.00964564	0.163044	0.0457663	0.16938	0.0437969
DoHDA9	0 h	1	0.0722672	1	0.155315	1	0.0616538
	6 h	0.716978	0.056479	0.32496	0.0588707	0.199575	0.0211407
	12 h	0.634342	0.0675846	0.278355	0.0363981	1.21419	0.178729
	24 h	0.646923	0.0566164	1.54043	0.117518	1.12117	0.133922
	48 h	0.339151	0.0309088	0.417062	0.100492	0.912776	0.170182
DoHDA10	0 h	1	0.0389136	1	0.112777	1	0.043064
	6 h	0.522439	0.065495	2.03026	0.375872	0.265172	0.0236166
	12 h	0.455861	0.0386722	0.517632	0.0702032	0.82645	0.12363
	24 h	0.170558	0.0182388	1.11858	0.273596	0.389582	0.182735
	48 h	0.189027	0.0525409	0.0741539	0.0113187	0.789129	0.246759
DoHDT3	0 h	1	0.101358	1	0.245707	1	0.124292
	6 h	1.48796	0.103052	0.299716	0.0475596	1.28343	0.066426
	12 h	1.11342	0.0995038	0.63581	0.306743	0.965936	0.690417
	24 h	1.71119	0.411961	0.289506	0.0236651	0.870551	0.220161
	48 h	1.16878	0.132928	0.378055	0.110113	1.00116	0.0647857
DoHDT4	0 h	1	0.0707767	1	0.128834	1	0.0352649
	6 h	1.74513	0.138461	0.629233	0.121679	0.0415214	0.00364027
	12 h	1.4811	0.0610878	0.0885928	0.0117015	0.327598	0.0483208
	24 h	1.82978	0.336911	1.93634	0.134106	0.76313	0.033759
	48 h	1.94756	0.191179	0.127774	0.0208723	1.24689	0.717582
DoSRT2	0 h	1	0.0786597	1	0.111814	1	0.0403066
	6 h	0.610614	0.143714	1.05946	0.172675	0.337978	0.0578749
	12 h	0.698178	0.0409136	0.536506	0.0792064	0.818847	0.177028
	24 h	0.703034	0.0649467	2.13366	0.400706	5.61778	0.496872
	48 h	0.640232	0.0459517	0.783678	0.115593	6.33495	0.972905
