# Supplementary material for: Identification of histone deacetylase genes in Dendrobium officinale and their expression profiles under phytohormone and abiotic stress treatments
Source: PeerJ. 2020 Dec 15;8:e10482. doi: 10.7717/peerj.10482 (PMC7747690; doi:10.7717/peerj.10482)
Supplement: Supplemental Information 5 [file peerj-08-10482-s005.xlsx]

## Sheet: string_mapping
#queryIndex	query Item	string Id	identity	bitscore	preferred Name	annotation
1	DoHDA1	3702.AT4G33470.1	73	387.5	HDA14	Histone deacetylase 14; Responsible for the deacetylation of lysine residues on the N-terminal part of the core histones (H2A, H2B, H3 and H4). Histone deacetylation gives a tag for epigenetic repression and plays an important role in transcriptional regulation, cell cycle progression and developmental events. Histone deacetylases act via the formation of large multiprotein complexes (By similari…
7	DoHDA10	3702.AT5G61070.1	51	75.1	HDA18	Histone deacetylase of the RPD3/HDA1 superfamily 18; Responsible for the deacetylation of lysine residues on the N-terminal part of the core histones (H2A, H2B, H3 and H4). Histone deacetylation gives a tag for epigenetic repression and plays an important role in transcriptional regulation, cell cycle progression and developmental events. Required for appropriate cellular patterning in the root e…
8	DoHDA2	3702.AT5G61060.2	56	771.2	HDA05	Histone deacetylase 5; Responsible for the deacetylation of lysine residues on the N-terminal part of the core histones (H2A, H2B, H3 and H4). Histone deacetylation gives a tag for epigenetic repression and plays an important role in transcriptional regulation, cell cycle progression and developmental events. Histone deacetylases act via the formation of large multiprotein complexes (By similarit…
13	DoHDA3	3702.AT3G44680.1	79	725.7	HDA9	Histone deacetylase 9; Responsible for the deacetylation of lysine residues on the N-terminal part of the core histones (H2A, H2B, H3 and H4). Histone deacetylation gives a tag for epigenetic repression and plays an important role in transcriptional regulation, cell cycle progression and developmental events. Histone deacetylases act via the formation of large multiprotein complexes (By similarit…
18	DoHDA4	3702.AT4G33470.1	63	102.8	HDA14	Histone deacetylase 14; Responsible for the deacetylation of lysine residues on the N-terminal part of the core histones (H2A, H2B, H3 and H4). Histone deacetylation gives a tag for epigenetic repression and plays an important role in transcriptional regulation, cell cycle progression and developmental events. Histone deacetylases act via the formation of large multiprotein complexes (By similari…
19	DoHDA5	3702.AT1G08460.1	70	532.7	HDA08	Histone deacetylase 8; Responsible for the deacetylation of lysine residues on the N-terminal part of the core histones (H2A, H2B, H3 and H4). Histone deacetylation gives a tag for epigenetic repression and plays an important role in transcriptional regulation, cell cycle progression and developmental events. Histone deacetylases act via the formation of large multiprotein complexes (By similarit…
24	DoHDA6	3702.AT3G18520.2	62	572.4	HDA15	Histone deacetylase 15; Responsible for the deacetylation of lysine residues on the N-terminal part of the core histones (H2A, H2B, H3 and H4). Histone deacetylation gives a tag for epigenetic repression and plays an important role in transcriptional regulation, cell cycle progression and developmental events. Histone deacetylases act via the formation of large multiprotein complexes (By similari…
29	DoHDA7	3702.AT4G38130.1	86	773.5	HD1	Encodes a histone deacetylase that enhances AtERF7-mediated transcriptional repression. Binds SIM3 and ERF7. Expressed in the nucleus in most tissues examined and throughout the life of the plant. Involved in jasmonic acid and ethylene dependent pathogen resistance. The sequence in GenBank has 17 AG dinucleotide repeats missing, which is also missing in Ler shotgun sequence from Cereon. Although …
34	DoHDA8	3702.AT5G26040.2	72	372.5	HDA2	Histone deacetylase 2; Responsible for the deacetylation of lysine residues on the N-terminal part of the core histones (H2A, H2B, H3 and H4). Histone deacetylation gives a tag for epigenetic repression and plays an important role in transcriptional regulation, cell cycle progression and developmental events. Histone deacetylases act via the formation of large multiprotein complexes (By similarit…
35	DoHDA9	3702.AT5G63110.1	71	688	HDA6	Histone deacetylase 6; Responsible for the deacetylation of lysine residues on the N-terminal part of the core histones (H2A, H2B, H3 and H4). Might remove acetyl residues only from specific targets, such as rDNA repeats or complex transgenes. Histone deacetylation gives a tag for epigenetic repression and plays an important role in transcriptional regulation, cell cycle progression and developme…
40	DoHDT3	3702.AT5G03740.1	53	95.1	HD2C	Histone deacetylase HDT3; Probably mediates the deacetylation of lysine residues on the N-terminal part of the core histones (H2A, H2B, H3 and H4). Histone deacetylation gives a tag for epigenetic repression and plays an important role in transcriptional regulation, cell cycle progression and developmental events. Involved in the modulation of abscisic acid and stress-responsive genes; Belongs to…
44	DoHDT4	3702.AT3G44750.1	55	75.1	HDA3	Histone deacetylase HDT1; Probably mediates the deacetylation of lysine residues on the N-terminal part of the core histones (H2A, H2B, H3 and H4). Histone deacetylation gives a tag for epigenetic repression and plays an important role in transcriptional regulation, cell cycle progression and developmental events. Required for histone H3 'Lys-9' deacetylation. Involved in rRNA gene silencing in n…
46	DoSRT1	3702.AT5G55760.1	52	443	SRT1	NAD-dependent protein deacetylase SRT1; NAD-dependent protein deacetylase. Has deacetylase activity towards H3K9Ac. May have a function in the safeguard against genome instabiliy and DNA damage to ensure plant cell growth (By similarity); Belongs to the sirtuin family. Class IV subfamily
48	DoSRT2	3702.AT5G09230.7	78	453	SRT2	NAD-dependent protein deacylase SRT2; NAD-dependent protein deacylase. Catalyzes the NAD- dependent hydrolysis of acyl groups from lysine residues (By similarity). Negatively regulates plant basal defense against plant pathogens, possibly by suppressing salicylic acid biosynthesis; Belongs to the sirtuin family. Class II subfamily
