# Supplementary material for: Identification of histone deacetylase genes in Dendrobium officinale and their expression profiles under phytohormone and abiotic stress treatments
Source: PeerJ. 2020 Dec 15;8:e10482. doi: 10.7717/peerj.10482 (PMC7747690; doi:10.7717/peerj.10482)
Supplement: Supplemental Information 6 [file peerj-08-10482-s006.xlsx]

## Sheet: string_network_coordinates
#node	x_position	y_position	color	annotation
HDA3	0.210615	0.770641	rgb(187,255,101)	Histone deacetylase HDT1; Probably mediates the deacetylation of lysine residues on the N-terminal part of the core histones (H2A, H2B, H3 and H4). Histone deacetylation gives a tag for epigenetic repression and plays an important role in transcriptional regulation, cell cycle progression and developmental events. Required for histone H3 'Lys-9' deacetylation. Involved in rRNA gene silencing in n…
HOS15	0.454308	0.504804	rgb(201,239,117)	WD40 repeat-containing protein HOS15; Encodes a WD-40 protein involved in histone deacetylation in response to abiotic stress.Identified in a screen for mutations with altered expression of stress induced genes. Functions as a repressor of cold tolerance induced genes. Loss of function mutants are hypersensitive to freezing
HDA2	0.668462	0.298754	rgb(0,28,178)	Histone deacetylase 2; Responsible for the deacetylation of lysine residues on the N-terminal part of the core histones (H2A, H2B, H3 and H4). Histone deacetylation gives a tag for epigenetic repression and plays an important role in transcriptional regulation, cell cycle progression and developmental events. Histone deacetylases act via the formation of large multiprotein complexes (By similarit…
HTB9	0.611231	0.826157	rgb(148,239,117)	Histone superfamily protein; Core component of nucleosome. Nucleosomes wrap and compact DNA into chromatin, limiting DNA accessibility to the cellular machineries which require DNA as a template. Histones thereby play a central role in transcription regulation, DNA repair, DNA replication and chromosomal stability. DNA accessibility is regulated via a complex set of post-translational modificatio…
hda10	0.571538	0.422598	rgb(117,215,239)	Putative histone deacetylase 10; Responsible for the deacetylation of lysine residues on the N-terminal part of the core histones (H2A, H2B, H3 and H4). Histone deacetylation gives a tag for epigenetic repression and plays an important role in transcriptional regulation, cell cycle progression and developmental events. Histone deacetylases act via the formation of large multiprotein complexes (By…
SNL1	0.285385	0.825089	rgb(239,206,117)	Paired amphipathic helix protein Sin3-like 1; Acts as a transcriptional repressor. An histone deacetylase (HDAC) activity is required for transcription repression. May play a role in telomere stability
SNL3	0.326923	0.562456	rgb(239,188,117)	Paired amphipathic helix protein Sin3-like 3; Acts as a transcriptional repressor. Interacts with ERF7 to repress genes in abscisic acid and drought stress responses. The heterodimer represses transcription by tethering SNL3 to DNA
HTR4	0.648154	0.768505	rgb(166,239,117)	Histone superfamily protein; Variant histone H3 which replaces conventional H3 in a wide range of nucleosomes in active genes. Constitutes the predominant form of histone H3 in non-dividing cells and is incorporated into chromatin independently of DNA synthesis. Deposited at sites of nucleosomal displacement throughout transcribed genes, suggesting that it represents an epigenetic imprint of tran…
NFC5	0.503231	0.536833	rgb(184,239,117)	Nucleosome/chromatin assembly factor group C5; Core histone-binding subunit that may target chromatin assembly factors, chromatin remodeling factors and histone deacetylases to their histone substrates in a manner that is regulated by nucleosomal DNA; Belongs to the WD repeat RBAP46/RBAP48/MSI1 family
HDA9	0.434923	0.432206	rgb(178,171,0)	Histone deacetylase 9; Responsible for the deacetylation of lysine residues on the N-terminal part of the core histones (H2A, H2B, H3 and H4). Histone deacetylation gives a tag for epigenetic repression and plays an important role in transcriptional regulation, cell cycle progression and developmental events. Histone deacetylases act via the formation of large multiprotein complexes (By similarit…
HDA05	0.722923	0.543238	rgb(239,117,117)	Histone deacetylase 5; Responsible for the deacetylation of lysine residues on the N-terminal part of the core histones (H2A, H2B, H3 and H4). Histone deacetylation gives a tag for epigenetic repression and plays an important role in transcriptional regulation, cell cycle progression and developmental events. Histone deacetylases act via the formation of large multiprotein complexes (By similarit…
HDA15	0.556769	0.2379	rgb(255,175,101)	Histone deacetylase 15; Responsible for the deacetylation of lysine residues on the N-terminal part of the core histones (H2A, H2B, H3 and H4). Histone deacetylation gives a tag for epigenetic repression and plays an important role in transcriptional regulation, cell cycle progression and developmental events. Histone deacetylases act via the formation of large multiprotein complexes (By similari…
FLD	0.739538	0.661744	rgb(117,239,192)	Flavin containing amine oxidoreductase family protein; Probable histone demethylase that promotes flowering independently of the photoperiod and vernalization pathways by repressing FLOWERING LOCUS C (FLC), a floral repressor that blocks the transition from vegetative to reproductive development. Probably mediates histone H3 'Lys-4' demethylation at FLC locus. Seems to act in partial redundancy w…
HTA2	0.500462	0.895552	rgb(117,239,121)	Probable histone H2A.3; Core component of nucleosome. Nucleosomes wrap and compact DNA into chromatin, limiting DNA accessibility to the cellular machineries which require DNA as a template. Histones thereby play a central role in transcription regulation, DNA repair, DNA replication and chromosomal stability. DNA accessibility is regulated via a complex set of post-translational modifications of…
SRT2	0.718308	0.432206	rgb(101,199,255)	NAD-dependent protein deacylase SRT2; NAD-dependent protein deacylase. Catalyzes the NAD- dependent hydrolysis of acyl groups from lysine residues (By similarity). Negatively regulates plant basal defense against plant pathogens, possibly by suppressing salicylic acid biosynthesis; Belongs to the sirtuin family. Class II subfamily
RBR1	0.554	0.658541	rgb(239,224,117)	Retinoblastoma-related protein 1; Key regulator of entry into cell division. Acts as a transcription repressor of E2F target genes, whose activity is required for progress from the G1 to the S phase of the cell cycle. Hyperphosphorylation by CDKA-1 prevents the binding to E2F transcription factors, allowing G1 to S phase transition to operate. Forms a stable complex with E2FA that functions in ma…
FVE	0.601077	0.529359	rgb(239,170,117)	Transducin family protein / WD-40 repeat family protein; Core histone-binding subunit that may target chromatin assembly factors, chromatin remodeling factors and histone deacetylases to their histone substrates in a manner that is regulated by nucleosomal DNA. Component of the flowering autonomous pathway which positively regulates flowering by promoting transcriptional repression of the floweri…
HD2C	0.193077	0.64573	rgb(0,178,157)	Histone deacetylase HDT3; Probably mediates the deacetylation of lysine residues on the N-terminal part of the core histones (H2A, H2B, H3 and H4). Histone deacetylation gives a tag for epigenetic repression and plays an important role in transcriptional regulation, cell cycle progression and developmental events. Involved in the modulation of abscisic acid and stress-responsive genes; Belongs to…
HDA6	0.492154	0.677758	rgb(239,152,117)	Histone deacetylase 6; Responsible for the deacetylation of lysine residues on the N-terminal part of the core histones (H2A, H2B, H3 and H4). Might remove acetyl residues only from specific targets, such as rDNA repeats or complex transgenes. Histone deacetylation gives a tag for epigenetic repression and plays an important role in transcriptional regulation, cell cycle progression and developme…
AT2G46040	0.303846	0.436477	rgb(130,239,117)	ARID/BRIGHT DNA-binding domain;ELM2 domain protein; Its function is described as DNA binding; Involved in biological_process unknown; Located in intracellular; Expressed in sperm cell, male gametophyte, cultured cell, seed, pollen tube; Expressed during M germinated pollen stage, E expanded cotyledon stage; Contains the following InterPro domains: ELM2 (InterPro:IPR000949), ARID/BRIGHT DNA-bindin…
MET1	0.642615	0.901957	rgb(117,239,210)	DNA (cytosine-5)-methyltransferase 1; Maintains chromatin CpG methylation that plays a role in genomic imprinting, regulation of embryogenesis and seed viability. Required for proper patterns of CG DNA methylation in dividing cells. Required for MEA promoter methylation in seeds
HDA14	0.749692	0.322242	rgb(14,178,0)	Histone deacetylase 14; Responsible for the deacetylation of lysine residues on the N-terminal part of the core histones (H2A, H2B, H3 and H4). Histone deacetylation gives a tag for epigenetic repression and plays an important role in transcriptional regulation, cell cycle progression and developmental events. Histone deacetylases act via the formation of large multiprotein complexes (By similari…
HTA9	0.525385	0.812278	rgb(117,239,139)	Probable histone H2A variant 3; Variant histones H2A are synthesized throughout the cell cycle and are very different from classical S-phase regulated H2A. May replace conventional H2A in a subset of nucleosomes. Nucleosomes wrap and compact DNA into chromatin, limiting DNA accessibility to the cellular machineries which require DNA as a template. Histones thereby play a central role in transcrip…
HDA18	0.798615	0.425801	rgb(239,135,117)	Histone deacetylase of the RPD3/HDA1 superfamily 18; Responsible for the deacetylation of lysine residues on the N-terminal part of the core histones (H2A, H2B, H3 and H4). Histone deacetylation gives a tag for epigenetic repression and plays an important role in transcriptional regulation, cell cycle progression and developmental events. Required for appropriate cellular patterning in the root e…
SRT1	0.567846	0.356406	rgb(150,101,255)	NAD-dependent protein deacetylase SRT1; NAD-dependent protein deacetylase. Has deacetylase activity towards H3K9Ac. May have a function in the safeguard against genome instabiliy and DNA damage to ensure plant cell growth (By similarity); Belongs to the sirtuin family. Class IV subfamily
PIF3	0.557692	0.103381	rgb(219,239,117)	Transcription factor interacting with photoreceptors phyA and phyB. Forms a ternary complex in vitro with G-box element of the promoters of LHY, CCA1. Acts as a negative regulator of phyB signalling. It degrades rapidly after irradiation of dark grown seedlings in a process controlled by phytochromes. Does not play a significant role in controlling light input and function of the circadian clockw…
hda17	0.602	0.437544	rgb(117,239,228)	Histone deacetylase 17; Responsible for the deacetylation of lysine residues on the N-terminal part of the core histones (H2A, H2B, H3 and H4). Histone deacetylation gives a tag for epigenetic repression and plays an important role in transcriptional regulation, cell cycle progression and developmental events. Histone deacetylases act via the formation of large multiprotein complexes (By similari…
HD1	0.428462	0.666014	rgb(101,255,163)	Encodes a histone deacetylase that enhances AtERF7-mediated transcriptional repression. Binds SIM3 and ERF7. Expressed in the nucleus in most tissues examined and throughout the life of the plant. Involved in jasmonic acid and ethylene dependent pathogen resistance. The sequence in GenBank has 17 AG dinucleotide repeats missing, which is also missing in Ler shotgun sequence from Cereon. Although …
MSI1	0.579846	0.69484	rgb(117,239,175)	Transducin/WD40 repeat-like superfamily protein; Encodes a WD-40 repeat containing protein that functions in chromatin assembly as part of the CAF1 and FIE complex. Mutants exhibit parthenogenetic development that includes proliferation of unfertilized endosperm and embryos. In heterozygous plants 50% of embryos abort. Of the aborted embryos the early aborted class are homozygous and the later ab…
HDA08	0.386923	0.322242	rgb(255,0,0)	Histone deacetylase 8; Responsible for the deacetylation of lysine residues on the N-terminal part of the core histones (H2A, H2B, H3 and H4). Histone deacetylation gives a tag for epigenetic repression and plays an important role in transcriptional regulation, cell cycle progression and developmental events. Histone deacetylases act via the formation of large multiprotein complexes (By similarit…
HTA8	0.438615	0.800534	rgb(117,233,239)	Probable histone H2A variant 2; Variant histones H2A are synthesized throughout the cell cycle and are very different from classical S-phase regulated H2A. May replace conventional H2A in a subset of nucleosomes. Nucleosomes wrap and compact DNA into chromatin, limiting DNA accessibility to the cellular machineries which require DNA as a template. Histones thereby play a central role in transcrip…
HTA11	0.558615	0.88274	rgb(117,239,157)	Histone H2A variant 1; Variant histone H2A which may replace conventional H2A in a subset of nucleosomes. Nucleosomes wrap and compact DNA into chromatin, limiting DNA accessibility to the cellular machineries which require DNA as a template. Histones thereby play a central role in transcription regulation, DNA repair, DNA replication and chromosomal stability. DNA accessibility is regulated via …
HTB2	0.450615	0.859253	rgb(237,239,117)	Histone H2B.10; Core component of nucleosome. Nucleosomes wrap and compact DNA into chromatin, limiting DNA accessibility to the cellular machineries which require DNA as a template. Histones thereby play a central role in transcription regulation, DNA repair, DNA replication and chromosomal stability. DNA accessibility is regulated via a complex set of post-translational modifications of histone…
